# Supplementary material
Source: PubMed Central journal article supplement (PMC5247665)
Supplement: 10.1074_M116.757864_jbc.M116.757864-1.pdf [file 10.1074_M116.757864_jbc.M116.757864-1.pdf]

**Supplementary Material – Patel et al.**

**Table S1      Composition of fatty acid mixture**

| <b>Component</b>                 |      | <b>Concentration (mg/L)</b> |
|----------------------------------|------|-----------------------------|
| Arachidonic acid                 | 20:4 | 2                           |
| Cholesterol                      |      | 220                         |
| DL- $\alpha$ -Tocophenol Acetate |      | 70                          |
| Linoleic Acid                    | 18:2 | 10                          |
| Linolenic Acid                   | 18:3 | 10                          |
| Myristic Acid                    | 14:0 | 10                          |
| Oleic Acid                       | 18:1 | 10                          |
| Palmitic Acid                    | 16:0 | 10                          |
| Puronic F-68                     |      | 90000                       |
| Stearic Acid                     | 18:0 | 10                          |
| Tween 80 ®                       |      | 2200                        |

Composition of fatty acid mixture used in this study. Concentration is shown along with chain length and number of double bonds. The fatty acid mix was obtained from Invitrogen (11905).
